# Supplementary material for: Short-Term Effects of Anodal Transcranial Direct Current Stimulation on Endurance and Maximal Force Production: A Systematic Review and Meta-Analysis
Source: PubMed Central journal article supplement (PMC6518246; doi:10.3390/jcm8040536), 2019-04-18
Supplement: jcm-08-00536-s001.pdf [file jcm-08-00536-s001.pdf]

**Table S1.** PEDro ratings of the qualitative assessment.

|    |                                                                                                                                                                                                                        | Abdelmo<br>ula et al.<br>(2016) | Angi<br>us et al.<br>(2015) | Angi<br>us et al.<br>(2016) | Angi<br>us et al.<br>(2018) | Barwo<br>od et al.<br>(2016) | Cogiama<br>nian et al.<br>(2007) | Flood<br>et al.<br>(2017) | Fraz<br>er et al.<br>(2016) | Hazi<br>me et al.<br>(2017) | Kan<br>et al.<br>(2013) | Latt<br>ari et al.<br>(2018) | Mont<br>enegr<br>o et al.<br>(2015) | Muthal<br>ib et al.<br>(2013) | Oka<br>no et al.<br>(2015) | Oki<br>et al.<br>(2016) | Oki<br>et al.<br>(2017) | Rad<br>el et al.<br>(2017) | Sale<br>s et al.<br>(2016) | Tana<br>ka et al.<br>(2009) | Varg<br>as et al.<br>(2017) | Vitor-<br>Costa et al.<br>(2015) | Washaba<br>ugh et al.<br>(2016) | Willia<br>ms et al.<br>(2013) |
|----|------------------------------------------------------------------------------------------------------------------------------------------------------------------------------------------------------------------------|---------------------------------|-----------------------------|-----------------------------|-----------------------------|------------------------------|----------------------------------|---------------------------|-----------------------------|-----------------------------|-------------------------|------------------------------|-------------------------------------|-------------------------------|----------------------------|-------------------------|-------------------------|----------------------------|----------------------------|-----------------------------|-----------------------------|----------------------------------|---------------------------------|-------------------------------|
| 1  | Eligibility criteria were specified                                                                                                                                                                                    | Y                               | N                           | N                           | N                           | N                            | N                                | Y                         | N                           | N                           | N                       | N                            | Y                                   | N                             | N                          | Y                       | Y                       | Y                          | Y                          | N                           | Y                           | Y                                | Y                               | Y                             |
| 2  | Subjects were randomly allocated to groups                                                                                                                                                                             | Y                               | Y                           | Y                           | Y                           | Y                            | Y                                | Y                         | Y                           | Y                           | Y                       | Y                            | Y                                   | Y                             | Y                          | Y                       | Y                       | Y                          | Y                          | Y                           | Y                           | Y                                | Y                               | Y                             |
| 3  | Allocation was concealed                                                                                                                                                                                               | N                               | N                           | N                           | N                           | Y                            | Y                                | N                         | Y                           | Y                           | N                       | Y                            | N                                   | N                             | N                          | N                       | N                       | N                          | N                          | N                           | Y                           | N                                | Y                               | N                             |
| 4  | The groups were similar at baseline regarding the most important prognostic indicators                                                                                                                                 | Y                               | Y                           | Y                           | Y                           | Y                            | Y                                | Y                         | Y                           | Y                           | Y                       | Y                            | Y                                   | N                             | Y                          | Y                       | Y                       | Y                          | Y                          | Y                           | Y                           | Y                                | Y                               | Y                             |
| 5  | There was blinding of all subjects                                                                                                                                                                                     | Y                               | Y                           | Y                           | Y                           | Y                            | Y                                | Y                         | Y                           | Y                           | Y                       | Y                            | Y                                   | N                             | Y                          | Y                       | Y                       | Y                          | Y                          | N                           | Y                           | Y                                | N                               | Y                             |
| 6  | There was blinding of all therapists who administered the therapy                                                                                                                                                      | N                               | N                           | N                           | N                           | N                            | N                                | N                         | Y                           | N                           | N                       | N                            | N                                   | N                             | N                          | N                       | N                       | Y                          | N                          | N                           | N                           | N                                | N                               | N                             |
| 7  | There was blinding of all assessors who measured at least one key outcome                                                                                                                                              | N                               | N                           | N                           | N                           | N                            | N                                | N                         | N                           | Y                           | N                       | Y                            | Y                                   | N                             | Y                          | Y                       | Y                       | Y                          | Y                          | N                           | Y                           | N                                | N                               | N                             |
| 8  | Measures of at least one key outcome were obtained from more than 85% of the subjects initially allocated to groups                                                                                                    | Y                               | Y                           | Y                           | Y                           | Y                            | Y                                | Y                         | Y                           | Y                           | Y                       | Y                            | Y                                   | Y                             | Y                          | Y                       | Y                       | Y                          | Y                          | Y                           | Y                           | Y                                | Y                               | Y                             |
| 9  | All subjects for whom outcome measures were available received the treatment or control condition as allocated or, where this was not the case, data for at least one key outcome was analysed by "intention to treat" | Y                               | Y                           | Y                           | Y                           | Y                            | Y                                | Y                         | Y                           | Y                           | Y                       | Y                            | Y                                   | Y                             | Y                          | Y                       | Y                       | Y                          | Y                          | Y                           | Y                           | Y                                | Y                               | Y                             |
| 10 | The results of between-group statistical comparisons are reported for at least one key outcome                                                                                                                         | Y                               | Y                           | Y                           | Y                           | Y                            | Y                                | Y                         | Y                           | Y                           | Y                       | Y                            | Y                                   | Y                             | Y                          | Y                       | Y                       | Y                          | Y                          | Y                           | Y                           | Y                                | Y                               | Y                             |
| 11 | The study provides both point measures and measures of variability for at least one key outcome                                                                                                                        | N                               | N                           | N                           | Y                           | N                            | N                                | Y                         | Y                           | N                           | Y                       | N                            | N                                   | Y                             | N                          | Y                       | Y                       | Y                          | N                          | Y                           | Y                           | N                                | Y                               | Y                             |
|    | Total                                                                                                                                                                                                                  | 6                               | 7                           | 6                           | 7                           | 7                            | 7                                | 7                         | 9                           | 8                           | 7                       | 8                            | 7                                   | 5                             | 7                          | 8                       | 8                       | 9                          | 7                          | 6                           | 9                           | 6                                | 7                               | 7                             |

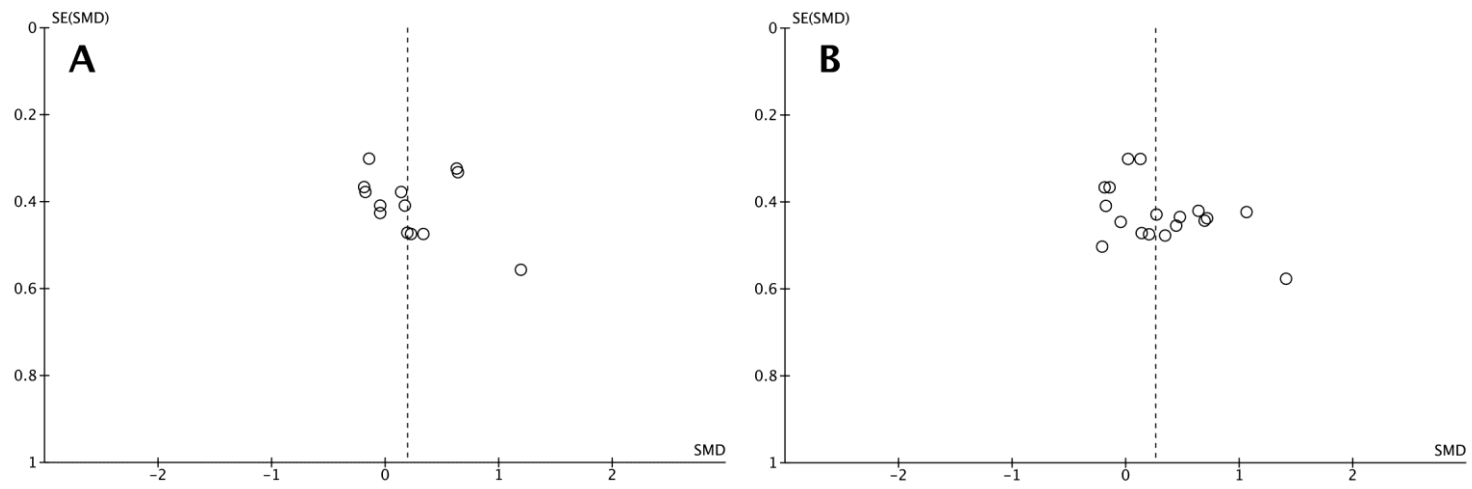

**Figure S1.** Funnel plot for MVC (A) and TTF (B) studies.
